# Supplementary material for: Interaction of triblock co-polymer micelles with phospholipid-bilayer: a spectroscopic investigation using a potential chloride channel blocker
Source: Royal Society of Chemistry journal article supplement (doi:10.1039/c4cp05574h), 2015-01-01
Supplement: c4cp05574h1.pdf [file c4cp05574h1.pdf]

**Supplementary information for**

**Interaction of triblock co-polymer micelles with phospholipid-bilayer: A spectral  
deciphering using a potential chloride channel blocker**

Aniruddha Ganguly, Soumen Ghosh and Nikhil Guchhait\*

*Department of Chemistry, University of Calcutta, 92 A. P. C. Road, Calcutta-700009,  
India*

\*To whom correspondence should be addressed. Tel.: +91-33-2350-8386. Fax: +91-33-  
2351-9755. E-mail: [nguchhait@yahoo.com](mailto:nguchhait@yahoo.com) (N.G.).

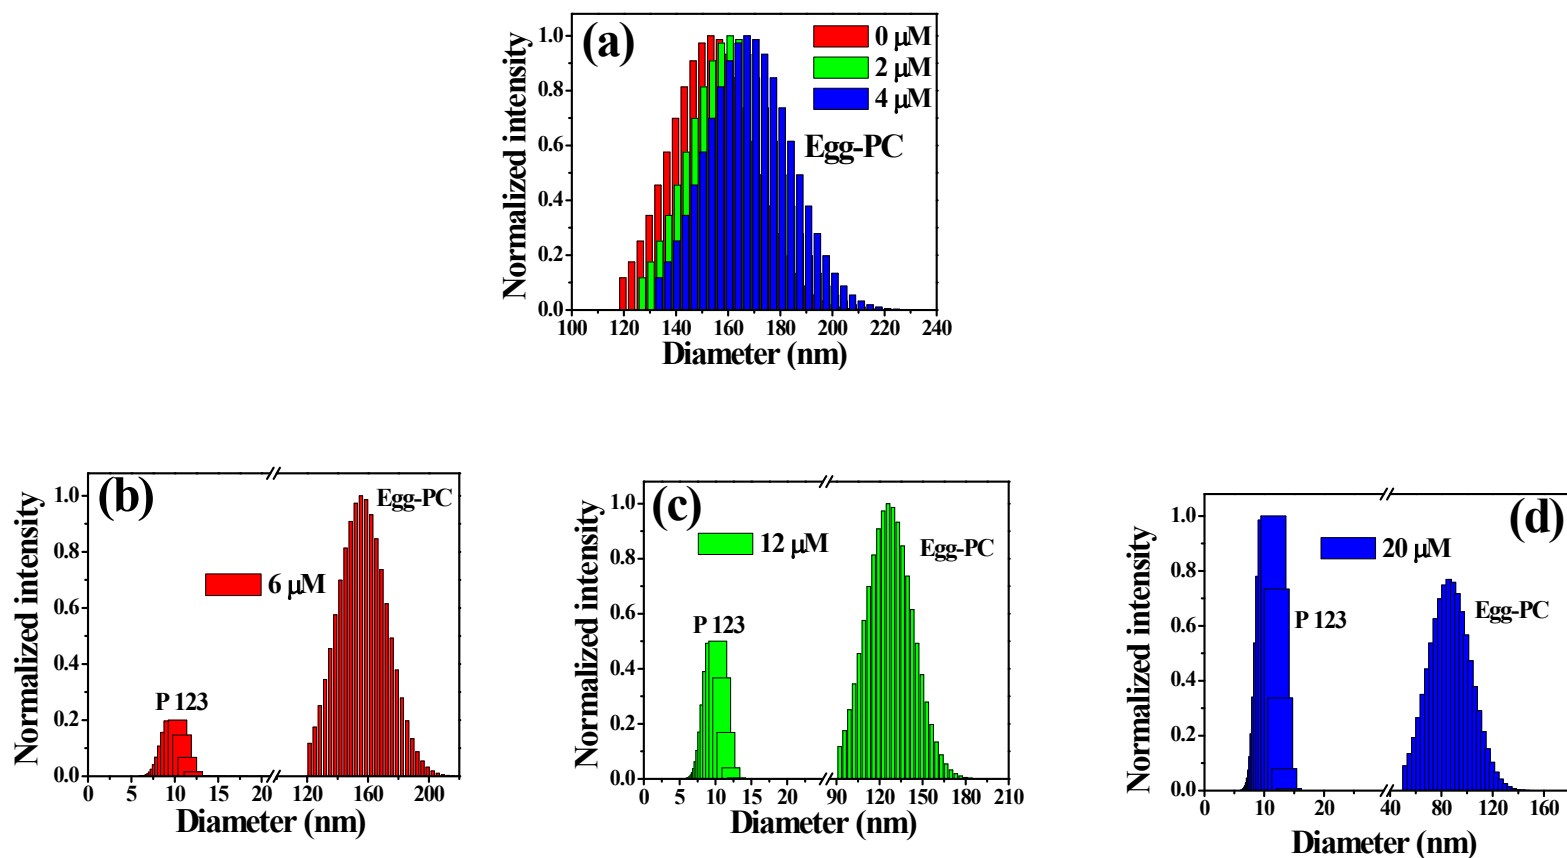

**Figure S1:** Plot (a) represents DLS spectra of 1 mM egg-PC solution in the presence of P 123 polymer in low concentration regime (up to 4  $\mu\text{M}$ ) as indicated in the figure legend. Plot (b) (c) and (d) represent the bimodal DLS spectra of 1 mM egg-PC solution in the presence of P 123 polymer in the concentration regime of  $> 4 \mu\text{M}$ , viz. 6, 12 and 20  $\mu\text{M}$  as mentioned in the figure. The spectra in the LHS represent lipid modified P 123 micelles whereas RHS represent P 123–egg-PC mixed vesicles.

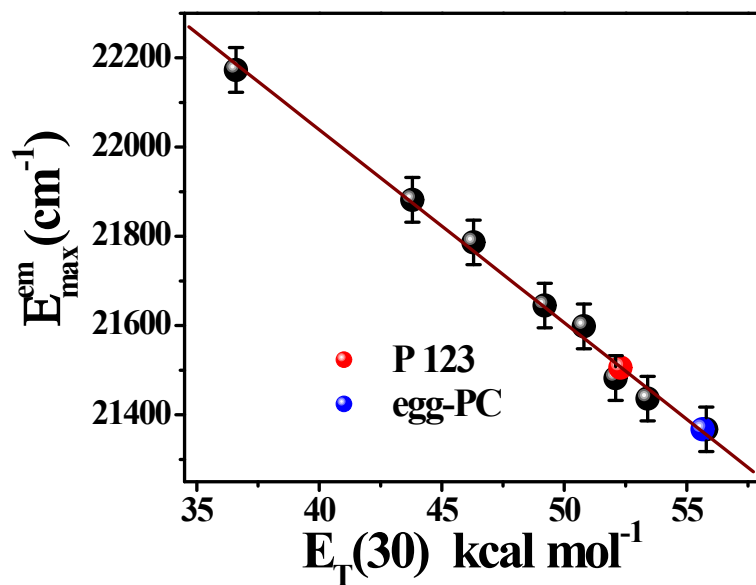

**Figure S2:** The plot of the variation of emission maxima of 9-MA in dioxane-water mixture against  $E_T(30)$  values. Each data point is an average of 5 individual measurements. The error bars are within the marker symbols if not apparent. The micropolarity of the binding site of 9-MA in egg-PC vesicles and P 123 micelles are indicated by the blue and the red points respectively.

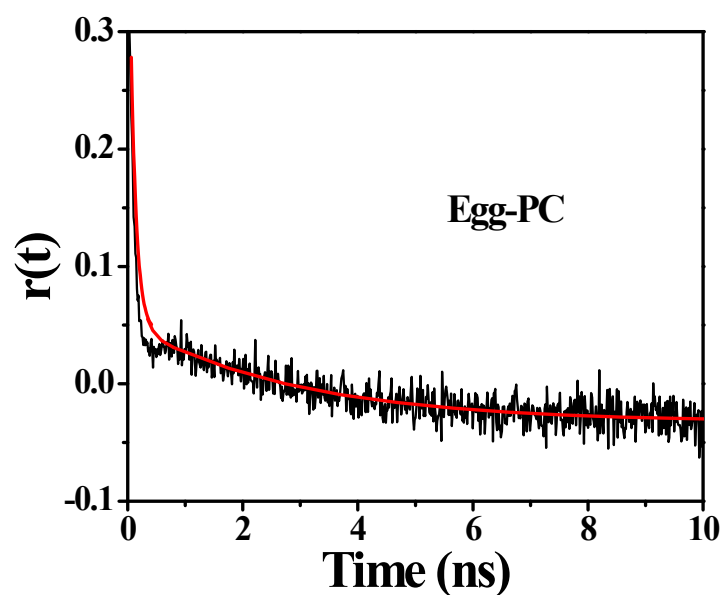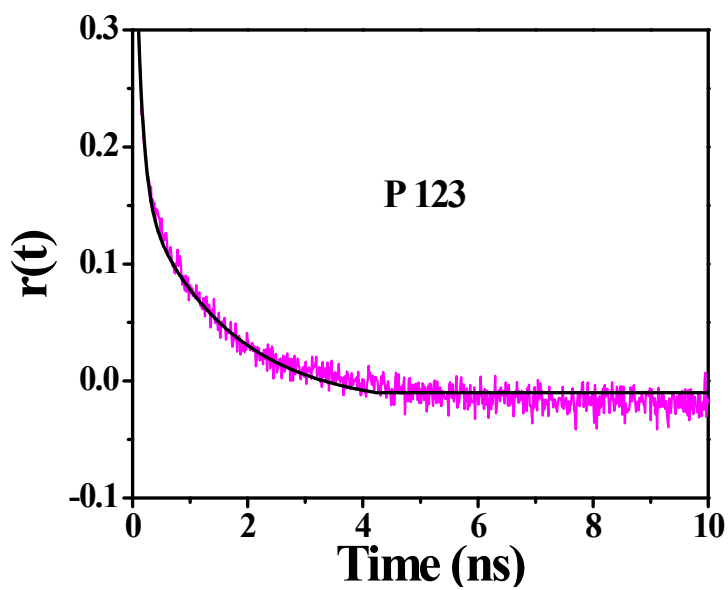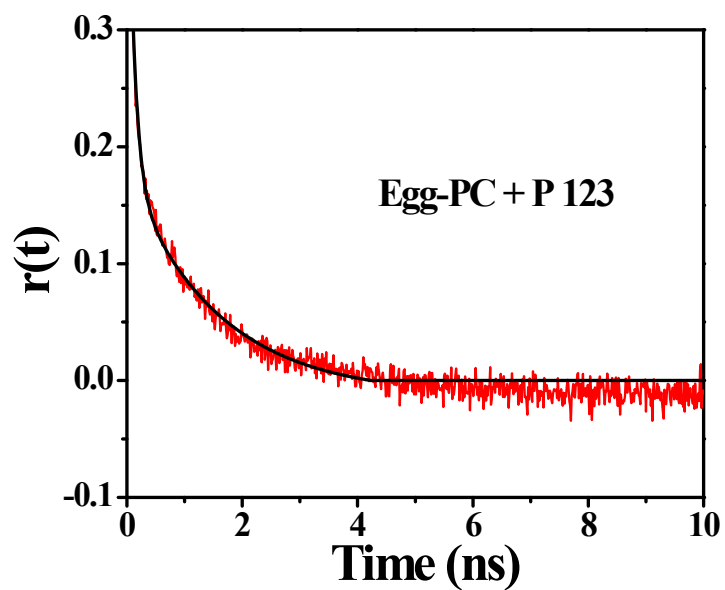

**Figure S3:** Individual fits for the time resolved anisotropy decay curves as indicated in the figure legend.
